# Supplementary material
Source: Springer Nature journal article supplement (https://www.springermedizin.de/resource/supplementary/12958_2014_1282_MOESM3_ESM.pdf/9566950)

Embryo 1

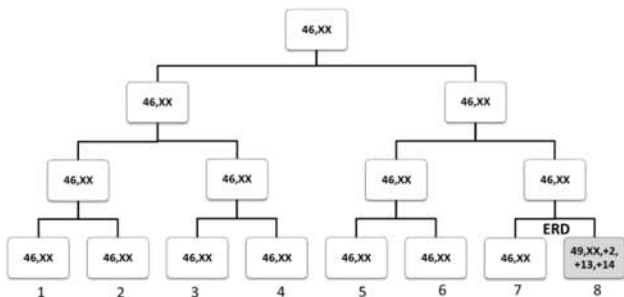

Embryo 2

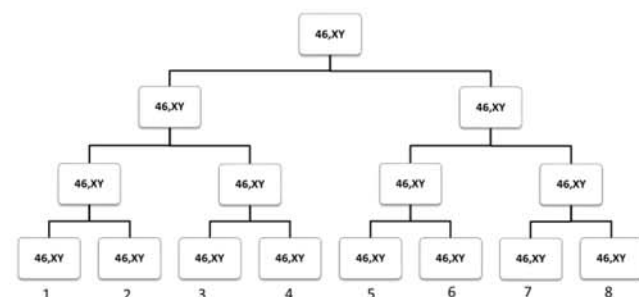

Embryo 3

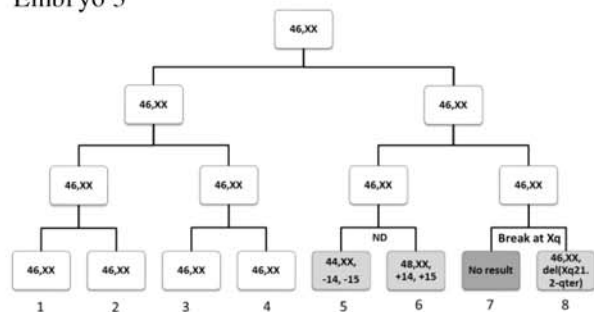

Embryo 4

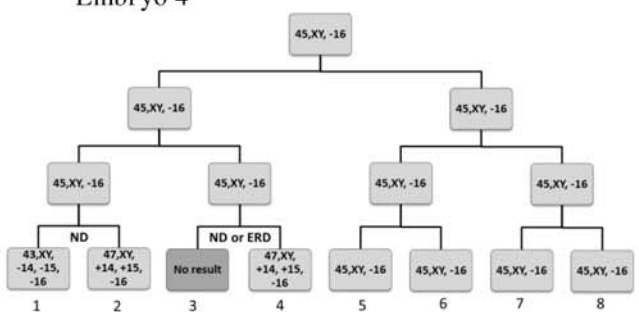

Embryo 5

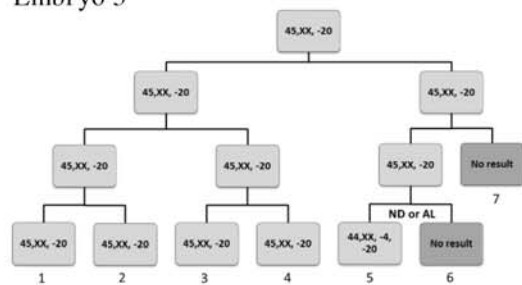

Embryo 6

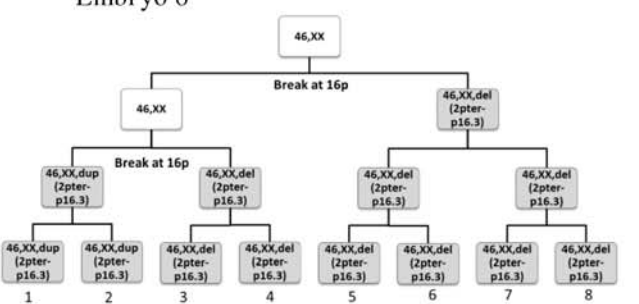

Embryo 8

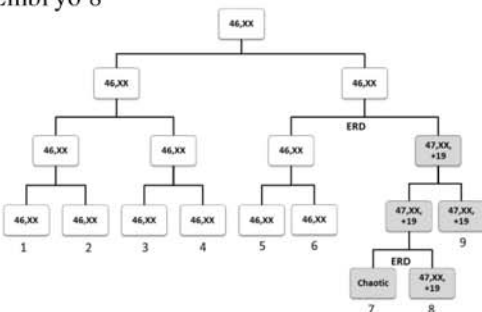

Embryo 9

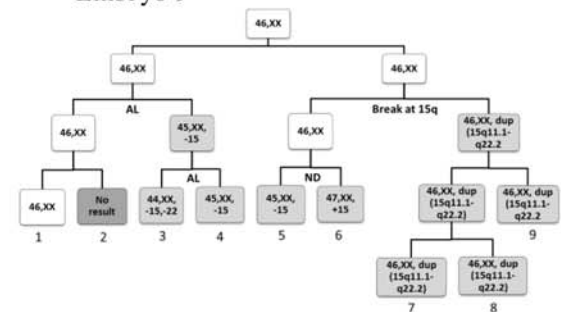

Supplement: MOESM3 [file 9566950]
